# Supplementary material for: Deep learning for the prediction of the chemotherapy response of metastatic colorectal cancer: comparing and combining H&E staining histopathology and infrared spectral histopathology
Source: Royal Society of Chemistry journal article supplement (doi:10.1039/d3an00627a), 2023-01-01
Supplement: d3an00627a1.pdf [file d3an00627a1.pdf]

## Supporting Information

# Deep learning for chemotherapy response of metastatic colorectal cancer: comparing and combining H&E staining histopathology and infrared spectral histopathology.

Benjamin Brunel<sup>ab‡</sup>, Pierre Prada<sup>a‡</sup>, Florian Slimano<sup>a</sup>, Camille Boulagnon-Rombi<sup>c</sup>, Olivier Bouché<sup>ad</sup> and Olivier Piot<sup>\*a</sup>

a. Université de Reims Champagne-Ardenne, EA7506-BioSpectroscopie Translationnelle (BioSpect), Reims, France.

b. Université de Franche-Comté, CNRS, institut FEMTO-ST, F-25000 Besançon, France.

c. Laboratoire d'anatomie et cytologie pathologique, CHU Reims, 51100 Reims, France.

d. Service d'Oncologie Digestive, CHU Reims, 51100 Reims, France.

**Table S1:** PFS predicted for each sub-image by the CNN on HE images Vs real PFS. All values are expressed in months.

| Real PFS | PFS predicted |                    |              |              |              |              |
|----------|---------------|--------------------|--------------|--------------|--------------|--------------|
|          | Average       | Standard variation | Sub-image #1 | Sub-image #2 | Sub-image #3 | Sub-image #4 |
| 14.9     | 23            | 1,5                | 22           | 25           |              |              |
| 15.3     | 19            | 2,1                | 17           | 22           | 17           | 20           |
| 15.4     | 19            | 4,4                | 26           | 14           | 20           | 17           |
| 20.7     | 22            | 6,8                | 32           | 16           | 23           | 15           |
| 35.1     | 31            | 3,0                | 27           | 29           | 31           | 35           |
| 41.3     | 29            | 1,1                | 31           | 29           | 29           | 28           |

**Table S2:** PFS predicted for each sub-image by the CNN on IR images Vs real PFS. All values are expressed in months.

| Real PFS | PFS predicted |                    |              |              |
|----------|---------------|--------------------|--------------|--------------|
|          | Average       | Standard variation | Sub-image #1 | Sub-image #2 |
| 14.9     | 19            | 1,5                | 18           | 21           |
| 15.3     | 17            | 4                  | 21           | 13           |
| 15.4     | 14            | 1,5                | 13           | 16           |
| 20.7     | 24            | 1,5                | 26           | 23           |
| 35.1     | 35            | 2                  | 33           | 38           |
| 41.3     | 27            | 2                  | 29           | 25           |

**Table S3:** PFS predicted for each sub-image by the fusion CNN Vs real PFS. All values are expressed in months.

| Real PFS | PFS predicted |                    |              |              |
|----------|---------------|--------------------|--------------|--------------|
|          | Average       | Standard deviation | Sub-image #1 | Sub-image #2 |
| 14.9     | 21            | 1,5                | 19           | 22           |
| 15.3     | 20            | 0                  | 20           | 20           |
| 15.4     | 18            | 5                  | 23           | 13           |
| 20.7     | 26            | 4,5                | 30           | 21           |
| 35.1     | 37            | 1                  | 38           | 36           |
| 41.3     | 34            | 0,5                | 33           | 34           |
